# Supplementary material for: Nitrogen Fertilizer Type and Genotype as Drivers of P Acquisition and Rhizosphere Microbiota Assembly in Juvenile Maize Plants
Source: MDPI journal article supplement (doi:10.3390/plants12030544), 2023-01-25
Supplement: s1 [file s1]

## Supplementary Materials

**Table S1.** Information on the maize genotypes used in this study.

| Genotype                                                                          | Date of release | Background                                                   |
|-----------------------------------------------------------------------------------|-----------------|--------------------------------------------------------------|
|  |                 |                                                              |
| F160                                                                              | 2015            | Elite flint line                                             |
| F7                                                                                | 1954            | Founder line; Originated from landrace from Lacaune (France) |

**Copyright:** © 2023 by the authors. Licensee MDPI, Basel, Switzerland. This article is an open access article distributed under the terms and conditions of the Creative Commons Attribution (CC BY) license (<https://creativecommons.org/licenses/by/4.0/>).

**Table S2.** The relative importance of plant presence for the bacterial and fungal community structure associated with ammonium fertilization.

| Parameter | Bacteria |       |                |       | Fungi |       |                |       |
|-----------|----------|-------|----------------|-------|-------|-------|----------------|-------|
|           | df       | F     | R <sup>2</sup> | P     | df    | F     | R <sup>2</sup> | P     |
| Plant     | 1        | 1.401 | 0.166          | 0.009 | 1     | 1.244 | 0.146          | 0.042 |

**Table S3.** The relative importance of plant presence for the bacterial and fungal community structure associated with nitrate fertilization.

| Parameter | Bacteria |       |                |       | Fungi |       |                |       |
|-----------|----------|-------|----------------|-------|-------|-------|----------------|-------|
|           | df       | F     | R <sup>2</sup> | P     | df    | F     | R <sup>2</sup> | P     |
| Plant     | 1        | 1.711 | 0.196          | 0.008 | 1     | 1.312 | 0.159          | 0.029 |

**Table S4.** Goodness-of-fit statistics (R<sup>2</sup>) of environmental variables fitted to the nonmetric multidimensional scaling ordination of fungal and bacterial community structure in maize rhizosphere. Only significant variables are reported.

| Parameter | Bacteria       |              | Fungi          |              |
|-----------|----------------|--------------|----------------|--------------|
|           | R <sup>2</sup> | P            | R <sup>2</sup> | P            |
| P         | 0.4672         | <b>0.039</b> | 0.4172         | 0.065        |
| Mn        | 0.6606         | <b>0.006</b> | 0.0323         | 0.849        |
| K         | 0.551          | <b>0.026</b> | 0.5509         | <b>0.027</b> |
| N         | 0.6033         | <b>0.016</b> | 0.5823         | <b>0.020</b> |
| RHL       | 0.4738         | <b>0.043</b> | 0.4434         | <b>0.046</b> |

Bold values indicates statistical significance.

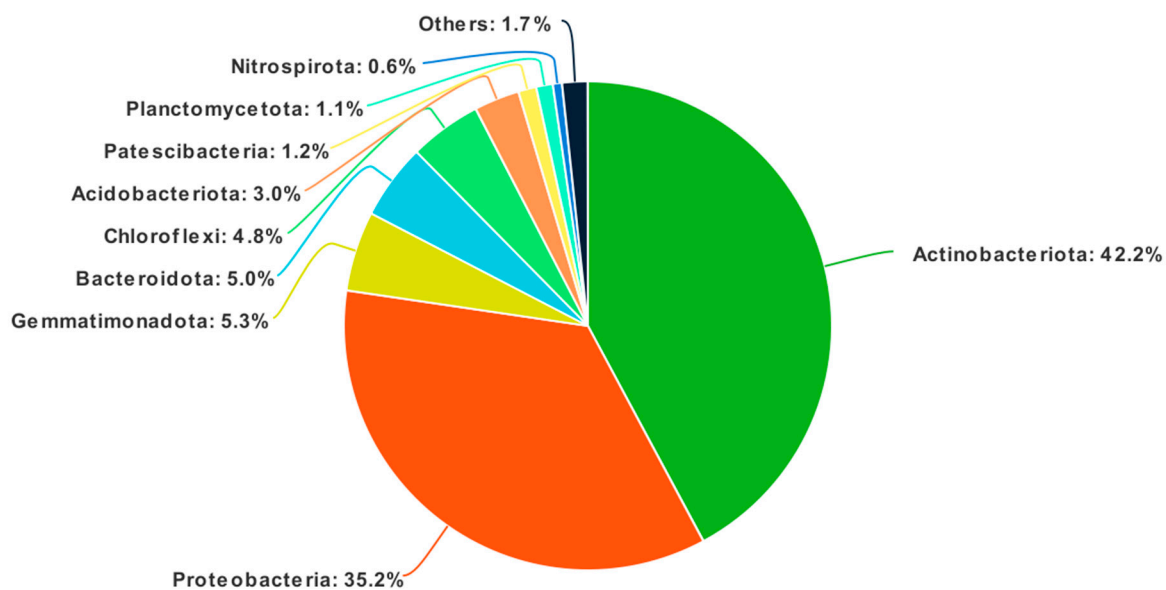

**Figure S1.** Relative abundances of the phyla detected within the bacterial dataset.

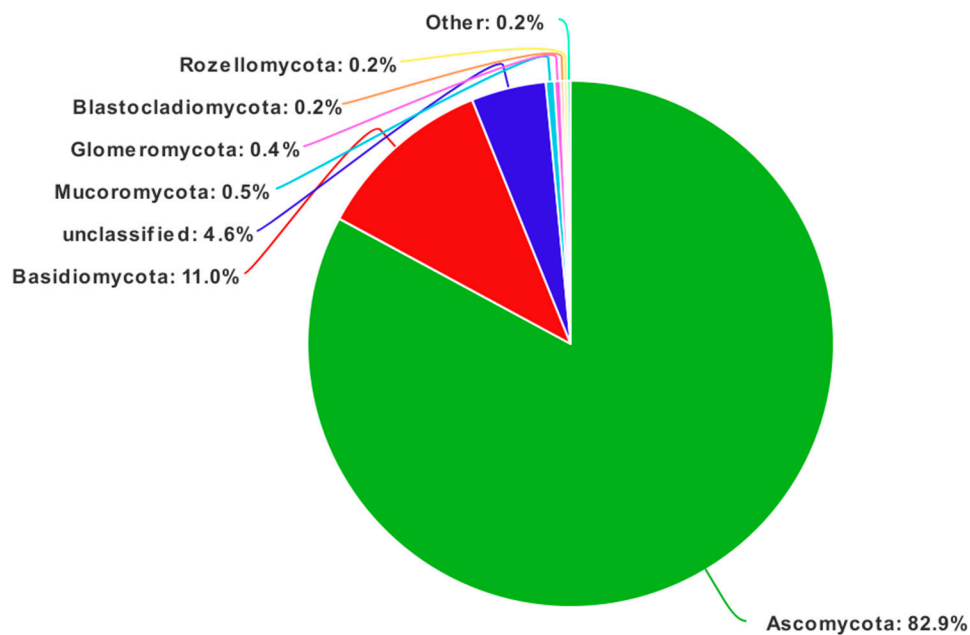

**Figure S2.** Relative abundances of the phyla detected within the fungal dataset.

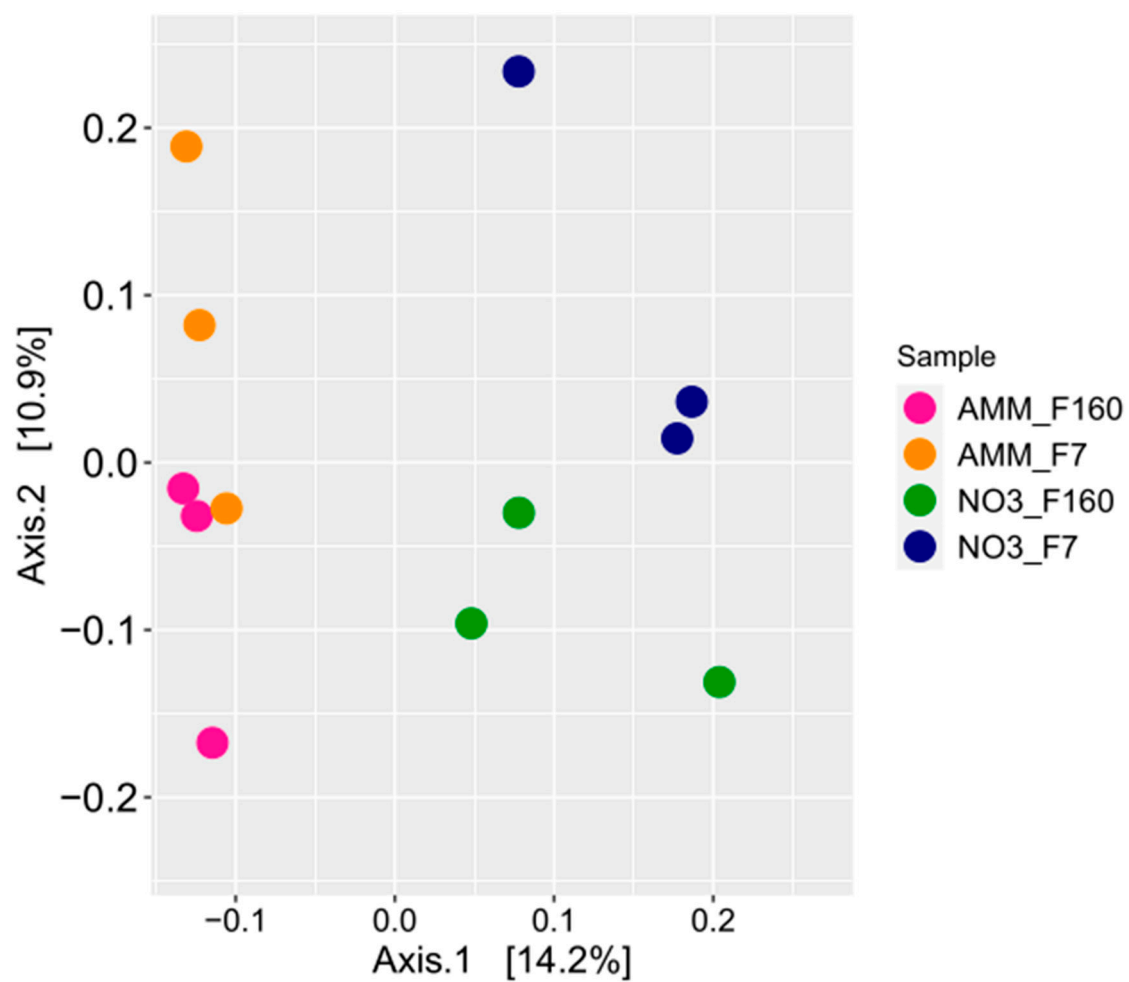

**Figure S3.** Principal coordinates analysis of the bacterial communities associated with the rhizosphere of the two maize genotypes in the different nitrogen treatments.

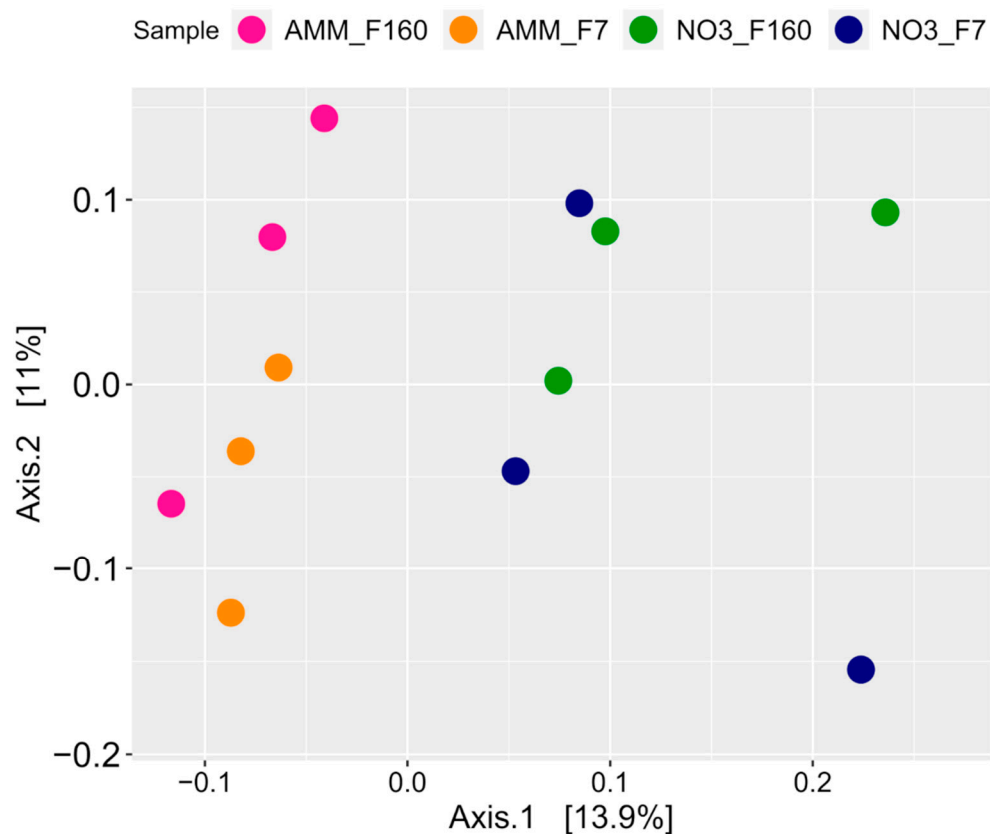

**Figure S4.** Principal coordinates analysis of the fungal communities associated with the rhizosphere of the two maize genotypes in the different nitrogen treatments.

**Disclaimer/Publisher's Note:** The statements, opinions and data contained in all publications are solely those of the individual author(s) and contributor(s) and not of MDPI and/or the editor(s). MDPI and/or the editor(s) disclaim responsibility for any injury to people or property resulting from any ideas, methods, instructions or products referred to in the content.
